# Supplementary material
Source: publisher figshare collection journal article supplement (https://sage.figshare.com/ndownloader/files/14014445)
Supplement: Supplementary file 1 [file 14014445]

**Appendix I: Medications Auto-Profiled in the Automated Dispensing Cabinet**

| Analgesics, anxiolytics, and sedative agents | Acetaminophen Tablets, Suppository  Benzocaine 20% spray  Bupivacaine 0.25% Injection  Chloroprocaine 2% Injection  Diazepam Injection, Intravenous Infusion  Fentanyl Injection  Hydrocodone/acetaminophen Tablet  Hydromorphone Injection  Ibuprofen Tablet  Ketorolac Injection  Lidocaine Injection /Urojet  Lidocaine/epinephrine Injection  Lorazepam Injection  Midazolam Injection  Morphine Injection  Naproxen Tablet  Propofol Injection, Intravenous Infusion |
| --- | --- |
| Cardiac and vasoactive agents | Adenosine Injection  Amiodarone Intravenous Infusion  Atropine Injection  Diltiazem Injection  Dobutamine Intravenous Infusion  Dopamine Intravenous Infusion  Ephedrine sulfate Injection  Epinephrine Injection, Intravenous infusion  Esmolol Intravenous Infusion  Hydralazine Injection  Labetolol Injection  Metoprolol Injection  Nicardapine Intravenous Infusion  Nitroglycerin Intravenous Infusion/Sublingual/Topical  Nitroprusside Injection  Norepinephrine Intravenous Infusion  Phentolamine Injection  Phenylephrine Injection, Intravenous Infusion  Procainamide Injection  Vasopressin Intravenous Infusion |
| Antithrombotic agents | Aspirin Tablet, Suppository  Clopidogrel Tablet  Prasugrel Tablet  Ticagrelor Tablet |
| Pulmonary agents | Albuterol HFA inhaler  Albuterol Nebulizer Solution  Albuterol-ipratropium Nebulizer Solution  Ipratropium HFA  Ipratropium Nebulizer Solution  Racemic Epinephrine Nebulizer Solution |
| Reversal agents | Activated Charcoal Suspension  Dextrose 50% in Water Injection  Flumazenil Injection  Glucagon Injection  Naloxone Injection |
| Neuroactive agents | Haloperidol Injection Levetiracetam Intravenous Infusion  Olanzapine Injection  Phenytoin Injection |
| Rapid sequence intubation | Etomidate Injection  Rocuronium Injection  Succinylcholine Injection  Ammonia Inhalation  Diphenhydramine Injection, Tablets |
| Other | Nalbuphine Injection  Ondansetron Injection  Oxymetazoline Spray  Sodium Bicarbonate Injection  Tetanus/Diphtheria Toxoid Injection  Tetanus/Diphtheria/ Pertussis Injection |
